# Supplementary material for: Comparison of the neuromuscular effects of two infusion rates of rocuronium in anesthetized pigs
Source: PubMed Central journal article supplement (PMC9753331; doi:10.1186/s13028-022-00658-7), 2022-12-15
Supplement: 13028_2022_658_MOESM1_ESM.pdf [file 13028_2022_658_MOESM1_ESM.pdf]

**Additional file 1** Individual monitoring values

| <b>Pig number and group</b> | <b>PR (beats/min)</b> | <b>RR (breaths/min)</b> | <b>SpO<sub>2</sub> (%)</b> | <b>EtCO<sub>2</sub> (kPa)</b> | <b>pH</b>          | <b>SAP (mmHg)</b> | <b>T, skin (°C)</b> | <b>T, central (°C)</b> | <b>Type of surgery</b> | <b>Major intervention</b> |
|-----------------------------|-----------------------|-------------------------|----------------------------|-------------------------------|--------------------|-------------------|---------------------|------------------------|------------------------|---------------------------|
| 1, Group L                  | 90 [87- 91]           | 16 [15- 16]             | 100                        | 5.0 [4.8- 5.6]                | S:7.415<br>E:7.488 | 76 [69-78]        | 37.1 [37.0- 37.2]   | 38.2 [37.9- 38.4]      | LT                     | Uro w/N                   |
| 2, Group H                  | 85 [69- 101]          | 13 [12- 13]             | 100                        | 4.9 [4.6- 5.6]                | S:7.250<br>E:7.183 | 68 [64-76]        | 35.3 [34.3- 35.3]   | 36.6 [36.3- 36.8]      | LT                     | Uro w/N                   |
| 3, Group L                  | 83 [80-85]            | 14 [13-14]              | 100 [99-100]               | 4.8 [4.6-5.2]                 | S:7.469<br>E:7.428 | 65 [56-72]        | 36.0 [35.1-36.6]    | 38.3 [38.0-38.4]       | LS                     | Uro w/o N                 |
| 4, Group L                  | 108 [103-124]         | 14 [12-14]              | 100                        | 5.1 [5.1-5.6]                 | S:7.445<br>E: N/A  | 75 [66-86]        | 35.7 [35.1-36.0]    | 37.1 [36.6-37.2]       | LS                     | Unknown                   |
| 5, Group H                  | 82 [82-87]            | 11 [10-13]              | 100                        | 5.0 [4.8-5.7]                 | S:7.447<br>E:7.404 | 83 [78-89]        | 35.0 [34.5-34.1]    | 35.4 [34.9-35.9]       | LS                     | Uro w/N + CC              |
| 6, Group H                  | 73 [64-77]            | 14 [11-14]              | 100                        | 5.0 [4.9-5.8]                 | S:7.405<br>E:7.389 | 89 [82-94]        | 36.9 [34.5-37.3]    | 37.2 [36.5-37.6]       | LS                     | Uro w/o N                 |
| 7, Group H                  | 74 [69-80]            | 11                      | 100                        | 4.9 [4.8-5.0]                 | S:7.466<br>E:7.457 | 94 [88-97]        | 35.5 [35.1-35.8]    | 35.6 [35.1-36.0]       | LS                     | Uro w/N + CC              |
| 8, Group L                  | 63 [62-65]            | 13                      | 99 [99-100]                | 5.3 [5.1-5.9]                 | S:7.453<br>E:7.400 | 74 [65-77]        | 36.0 [35.4-36.3]    | 37.2 [36.7-37.6]       | LS                     | IA + CC                   |
| 9, Group H                  | 73 [69-74]            | 15 [14-15]              | 100                        | 5.0 [4.9-5.5]                 | S:7.446<br>E:7.420 | 83 [73-86]        | 36.5 [36.3-36.7]    | 37.3 [36.9-37.7]       | LS                     | H + CC                    |
| 10, Group L                 | 87 [85-92]            | 15 [13-15]              | 100                        | 4.9 [4.6-5.2]                 | S:7.469<br>E:7.423 | 69 [53-76]        | 37.0 [36.7-37.7]    | 38.0 [37.6-38.0]       | LS                     | Unknown                   |
| 11, Group L                 | 81 [77-83]            | 13 [12-13]              | 98 [96-98]                 | 5.4 [5.2-5.5]                 | S:7.511<br>E:7.479 | 66 [65-69]        | 35.9 [35.7-36.5]    | 37.8 [37.7-37.8]       | LS                     | Uro w/o N                 |
| 12, Group L                 | 89 [89-103]           | 14 [14-15]              | 100                        | 4.9 [4.8-5.3]                 | S:7.584<br>E:7.383 | 71 [62-73]        | 35.5 [35.1-37.9]    | 38.4 [38.3-38.4]       | LS                     | Unknown                   |
| 13, Group H                 | 70 [68-70]            | 11 [10-11]              | 99                         | 5.3 [5.2-5.5]                 | S:7.440<br>E:7.390 | 63 [61-70]        | 33.6 [33.4-34.0]    | 35.4 [34.5-36.2]       | LS                     | Uro w/o N                 |
| 14, Group H                 | 78 [75-80]            | 16 [16-17]              | 99 [97-99]                 | 4.8 [4.7-5.1]                 | S:7.525<br>E:7.508 | 86 [80-96]        | 36.0 [35.6-36.2]    | 37.5 [37.4-37.6]       | LS                     | Uro w/N                   |

Monitoring values from all pigs presented as median [minimum-maximum]. pH is temperature corrected and reported as start of protocol (S) and end of protocol (E). N/A: not available. PR: pulse rate. RR: respiration rate. SpO<sub>2</sub>: oxygen saturation. EtCO<sub>2</sub>: end-tidal carbon dioxide. SAP: systolic arterial pressure. T, skin: skin temperature. T, central: central temperature. Type of surgery: laparotomy (LT), laparoscopy (LS). Operations: urology with unilateral nephrectomy (Uro w/N), urology without nephrectomy (Uro w/o N), intestinal anastomosis (IA), hysterectomy (H), cholecystectomy (CC).
